# Supplementary material
Source: MDPI journal article supplement (https://www.mdpi.com/2073-4344/9/2/107)
Supplement: s1 [file s1]

# Highly Dispersed Co Nanoparticles Prepared by an Improved Method for Plasma-Driven NH<sub>3</sub> Decomposition to Produce H<sub>2</sub>

Li Wang <sup>1,2,\*</sup>, YanHui Yi <sup>2</sup>, HongChen Guo <sup>2</sup>, XiaoMin Du <sup>1</sup>, Bin Zhu <sup>1</sup> and YiMin Zhu <sup>1,\*</sup>

<sup>1</sup> College of Environmental Science and Engineering, Dalian Maritime University, Dalian 116026, China; duxiaomin1202@163.com (X.D.); binzhu@dlmu.edu.cn (B.Z.)

<sup>2</sup> State Key Laboratory of Fine Chemicals, School of Chemical Engineering, Dalian University of Technology, Dalian 116024, China; yiyanhui@dlut.edu.cn (Y.Y.); hongchenguo@163.com (H.G.)

\* Correspondence: liwang@dlmu.edu.cn (L.W.); ntp@dlmu.edu.cn (Y.Z.); Tel.: +86-411-84724357 (L.W.)

1. Co loading analysis of fumed SiO<sub>2</sub> supported Co catalysts with different preparation methods, Table S1 and Table S2.

The theoretical Co content was 30 wt%, and the actual loading was expected to be similar with the theoretical loading because the incipient-wetness impregnation was employed to prepare fumed SiO<sub>2</sub> supported Co catalysts in this study. In addition, the actual loading of catalyst was measured using X-ray fluorescence (XRF, SRS-3400, Bruker, Germany) as following Table S1 and S2. Through calculating CoO to Co, 27.7 wt.% and 27.4 wt.% was achieved for Co/fumed SiO<sub>2</sub> prepared with “improved” and “conventional” methods, respectively.

Table S1. XRF analysis of Co/fumed SiO<sub>2</sub> with improved preparation method

| SiO <sub>2</sub> | CoO        | Fe <sub>2</sub> O <sub>3</sub> | CaO      | Cl       | Compton | Rayleigh | Norm.   |
|------------------|------------|--------------------------------|----------|----------|---------|----------|---------|
| 22.2 KCps        | 117.1 KCps | 0.6 KCps                       | 0.1 KCps | 0.1 KCps |         |          |         |
| 64.5%            | 35.2%      | 0.241%                         | 0.0527%  | 0.0493%  | 0.77    | 1.08     | 100.00% |

Table S2. XRF analysis of Co/fumed SiO<sub>2</sub> with conventional preparation method

| SiO <sub>2</sub> | CoO        | Fe <sub>2</sub> O <sub>3</sub> | CaO      | Cl       | Compton | Rayleigh | Norm.   |
|------------------|------------|--------------------------------|----------|----------|---------|----------|---------|
| 20.8 KCps        | 109.2 KCps | 0.3 KCps                       | 0.2 KCps | 0.1 KCps |         |          |         |
| 64.7%            | 34.9%      | 0.259%                         | 0.0659%  | 0.0625%  | 0.68    | 1.01     | 100.00% |

2. Analysis of each peak area of the H<sub>2</sub>-TPR profiles obtained using peak fit function (Gaussian) of Origin software, Figure S1.

The area ratio of  $\beta_1/\beta_2$  was found to be 1/3, which is quantitatively consistent with the theoretical value (1/3) of area ratio of Co<sub>3</sub>O<sub>4</sub> reduction peaks as shown in Eq (1) and Eq (2). This indicates that  $\beta_1$  and  $\beta_2$  was the two-step reduction of Co<sup>3+</sup> → Co<sup>2+</sup> → Co<sup>0</sup> of Co<sub>3</sub>O<sub>4</sub>, so does for the case of  $\alpha_1$  and  $\alpha_2$  based on 5/16 ( $\approx 1/3$ ) area ratio of  $\alpha_1/\alpha_2$ .

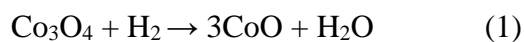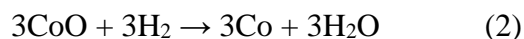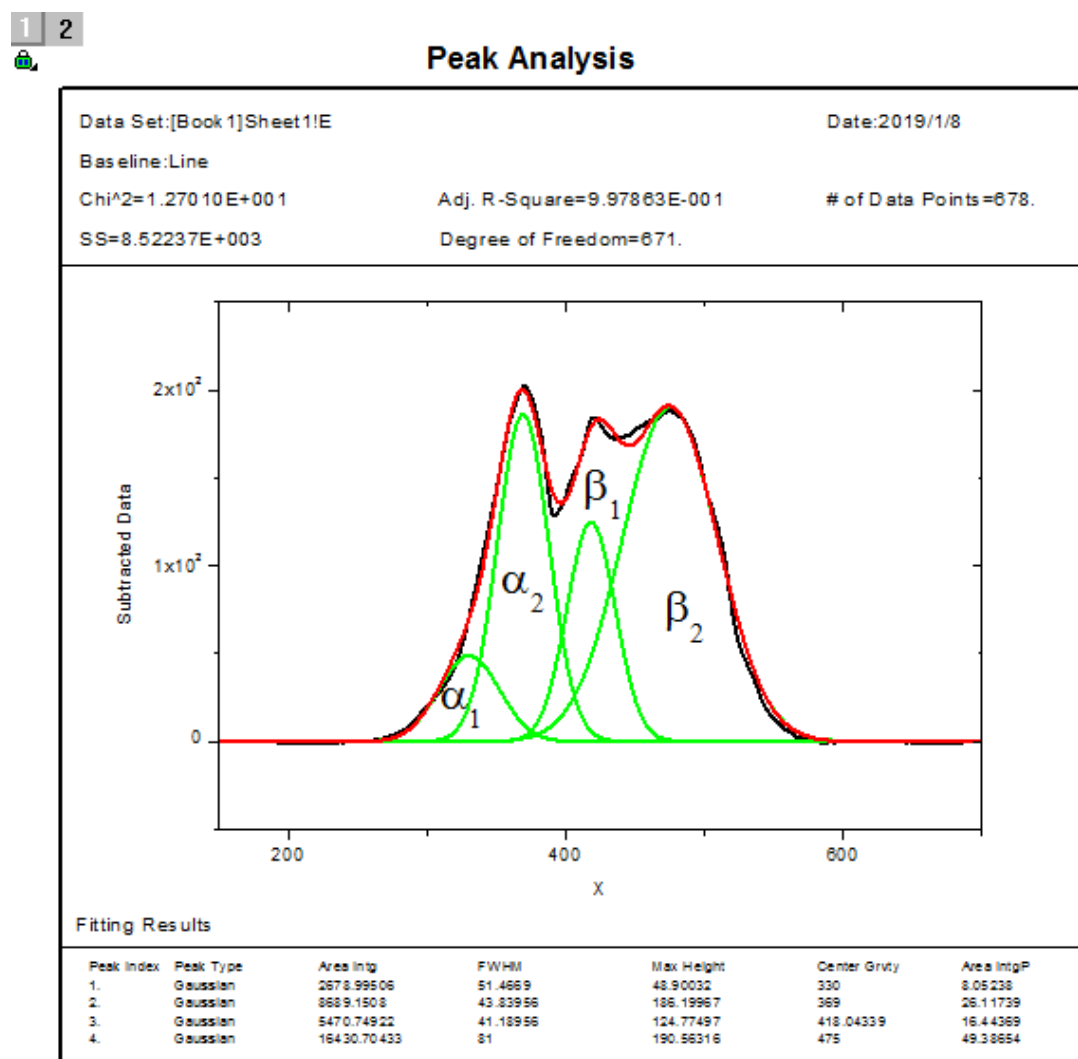

Figure S1. Peak analysis of H<sub>2</sub>-TPR profile obtained over Co<sub>3</sub>O<sub>4</sub>/fumed SiO<sub>2</sub> catalyst.
